# Supplementary material for: Enhanced chromaticity and dual emission in double-site Mn4+-activated KLiTiF6 red phosphors for wide color gamut displays
Source: Royal Society of Chemistry journal article supplement (doi:10.1039/d4tc04409f), 2024-12-30
Supplement: d4tc04409f1.pdf [file d4tc04409f1.pdf]

## Supporting Information

### Enhanced Chromaticity and Dual Emission in Double-Site Mn<sup>4+</sup>- Activated KLiTiF<sub>6</sub> Red Phosphor for Wide Color Gamut Displays

Zifan Shao,<sup>†a</sup> Qikai Yang,<sup>†a</sup> Qihao Li,<sup>a</sup> Jianye Yan,<sup>a</sup> Yuehua Chen,<sup>a</sup> Haolin Xu,<sup>a</sup> Wenjing Zhong,<sup>a</sup> Cailing Liu,<sup>a</sup> Yayun Zhou,<sup>a\*</sup> Tingting Deng,<sup>a\*</sup> Zhengliang Wang,<sup>b\*</sup>

<sup>a</sup> Guangdong-Hong Kong-Macao Joint Laboratory for Intelligent Micro-Nano Optoelectronic Technology, School of Physics and Optoelectronic Engineering, Foshan University, Foshan 528225, China

<sup>b</sup> Key Laboratory of Green-chemistry Materials in University of Yunnan Province, Yunnan Key Laboratory of Chiral Functional Substance Research and Application, School of Chemistry & Environment, Yunnan Minzu University, Kunming, 650500, China.

\*Corresponding author e-mail addresses: zhouyayun@fosu.edu.cn; (Y. Y. Zhou); tingtingdeng0803@163.com (T. T. Deng); wzhl@ymu.edu.cn (Z. L. Wang)

## 1. Figures

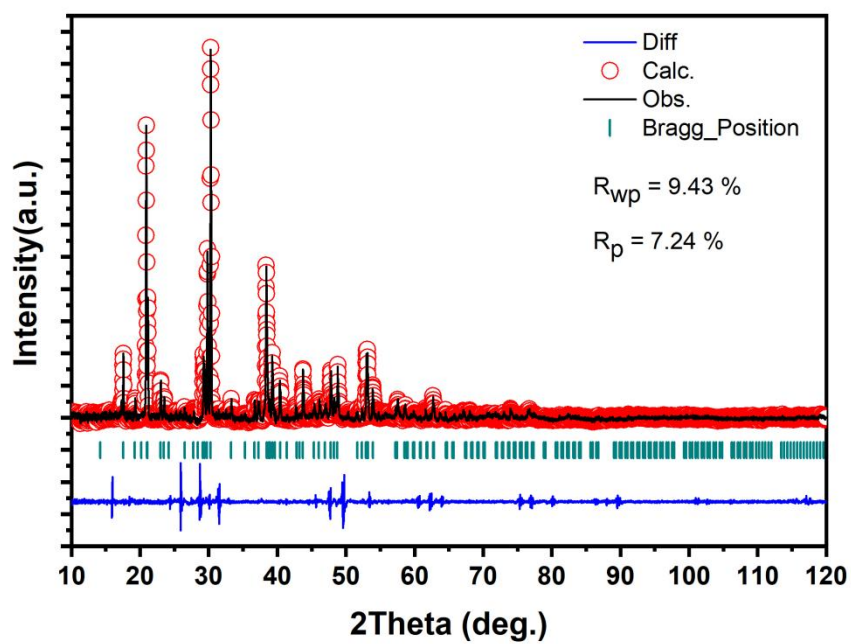

Fig. S1 XRD Rietveld refinement patterns of  $\text{KLiTiF}_6:4\%\text{Mn}^{4+}$  phosphor.

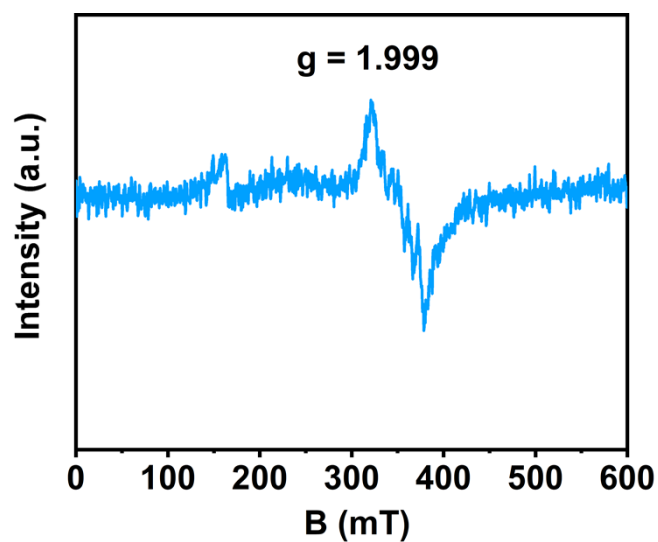

Fig. S2 EPR spectrum of  $\text{KLiTiF}_6:4\%\text{Mn}^{4+}$ .

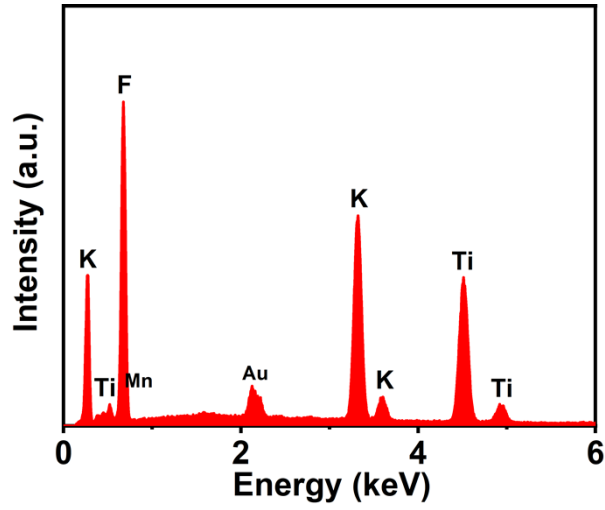

Fig. S3 EDS spectrum of  $\text{KLiTiF}_6:4\%\text{Mn}^{4+}$ .

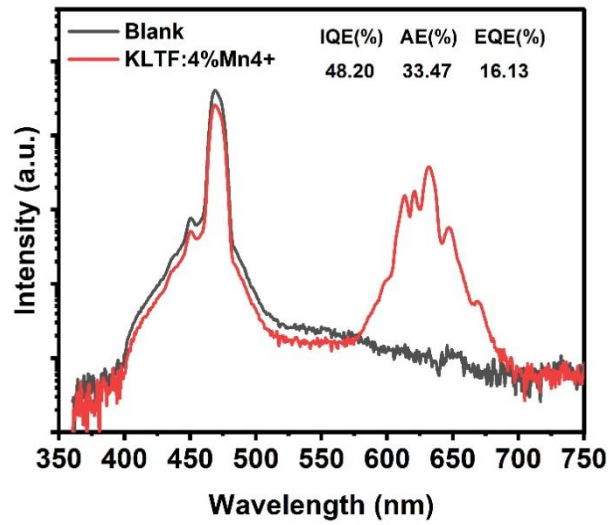

Fig. S4 Internal and external quantum efficiency, absorption efficiency of  $\text{KLiTiF}_6:4\%\text{Mn}^{4+}$  phosphor.

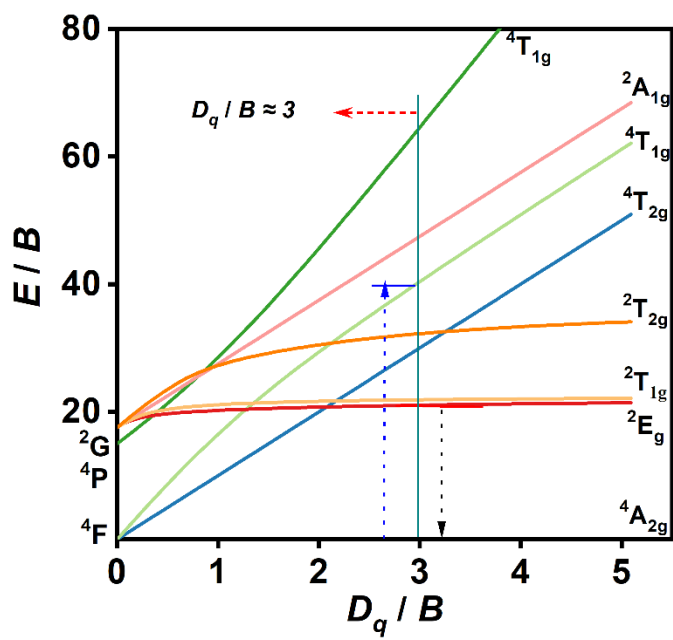

Fig. S5 Tanabe–Sugano energy-level diagram of  $\text{Mn}^{4+}$  in an octahedral crystal field.

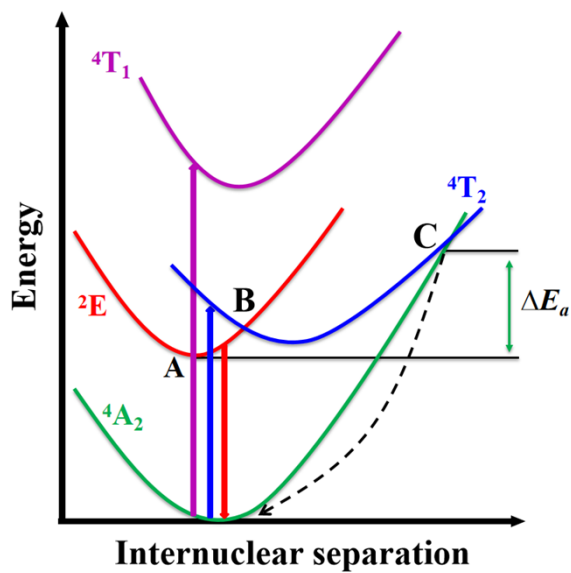

Fig. S6 Thermal quenching mechanism diagram for  $\text{Mn}^{4+}$  ions.

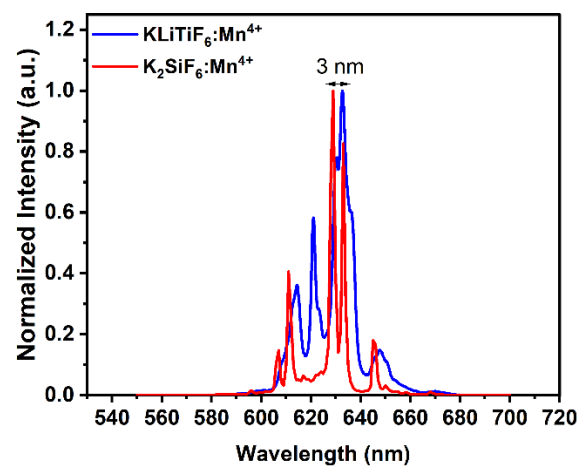

Fig. S7 Spectral comparison with the commercial  $\text{K}_2\text{SiF}_6:\text{Mn}^{4+}$  phosphor

## 2. Tables

**Table S1.** Crystallographic parameters of KLTF:4%Mn<sup>4+</sup> phosphor from XRD Rietveld refinement.

| Items                                    | Parameters                                                                                   |
|------------------------------------------|----------------------------------------------------------------------------------------------|
| Space group                              | <i>Pca2<sub>1</sub></i>                                                                      |
| Crystal structure                        | orthorhombic                                                                                 |
| a (Å)                                    | 12.51057                                                                                     |
| b (Å)                                    | 7.60580                                                                                      |
| c (Å)                                    | 10.01616                                                                                     |
| $\alpha = \beta = \gamma$ (°)            | 90                                                                                           |
| Volume (Å <sup>3</sup> )                 | 955.424                                                                                      |
| R <sub>wp</sub> (%)                      | 9.43                                                                                         |
| R <sub>p</sub> (%)                       | 7.24                                                                                         |
| Refined atomic positions                 | Mn <sub>Ti</sub> (0.25086, 0.63854, 0.07226)<br>Mn <sub>Li</sub> (0.24583, 0.64239, 0.43179) |
| Bond angles(°), the most distorted angle | F–Mn–F: 177.7675<br>F–Mn–F: 173.7681                                                         |

**Table S2.** Crystal structure and luminescent properties of Mn<sup>4+</sup>-doped fluoride red phosphors

| Series                         | Host                                              | Crystal Space group                                     | Excitation (nm) | Emission (nm) | ZPL(nm)     | PLQY (%)             | Refs. |
|--------------------------------|---------------------------------------------------|---------------------------------------------------------|-----------------|---------------|-------------|----------------------|-------|
|                                | (NH <sub>4</sub> ) <sub>2</sub> SiF <sub>6</sub>  | Cubic, $O_{h-Fm\bar{3}m}^5$                             | 380, 480        | 632           | weak        | 64.6*                | 1     |
|                                | Na <sub>2</sub> SiF <sub>6</sub>                  | Trigonal, $D_{3-P321}^2$                                | 355, 460        | 627           | Strong, 618 | -                    | 2     |
|                                | K <sub>2</sub> SiF <sub>6</sub>                   | Cubic, $O_{h-Fm\bar{3}m}^5$                             | 349, 450        | 630           | weak        | 80*, 54 <sup>#</sup> | 3, 4  |
|                                | KNaSiF <sub>6</sub>                               | Orthorhombic, $D_{2h-}^{16}$<br><i>pnma</i>             | 355, 460        | 629           | Strong, 620 | 90*, 41 <sup>#</sup> | 5, 6  |
|                                | Rb <sub>2</sub> SiF <sub>6</sub>                  | Cubic, $O_{h-Fm\bar{3}m}^5$                             | 350, 450        | 630           | weak        | -                    | 7     |
|                                | Cs <sub>2</sub> SiF <sub>6</sub>                  | Cubic, $O_{h-Fm\bar{3}m}^5$                             | 353, 454        | 633           | weak        | 89*, 71 <sup>#</sup> | 8, 9  |
|                                | (NH <sub>4</sub> ) <sub>2</sub> GeF <sub>6</sub>  | Trigonal, $D_{3d-P\bar{3}m1}^3$                         | 365, 468        | 633           | weak        | -                    | 1     |
|                                | Na <sub>2</sub> GeF <sub>6</sub>                  | Trigonal, $D_{3-P321}^2$                                | 355, 460        | 627           | Strong, 617 | -                    | 2, 10 |
|                                | K <sub>2</sub> GeF <sub>6</sub>                   | Trigonal, $D_{3d-P\bar{3}m1}^3$                         | 357, 461        | 631           | weak        | 54 <sup>#</sup>      | 11    |
| A <sub>2</sub> XF <sub>6</sub> | K <sub>2</sub> GeF <sub>6</sub>                   | Hexagonal, $C_{6v-}^4$<br><i>P6<sub>3</sub>mc</i>       |                 | 631           | Strong, 621 | -                    | 12    |
|                                | Rb <sub>2</sub> GeF <sub>6</sub>                  | Hexagonal, $C_{6v-}^4$<br><i>P6<sub>3</sub>mc</i>       | 360, 460        | 630           | Strong, 620 | 73*, 57 <sup>#</sup> | 13    |
|                                | Cs <sub>2</sub> GeF <sub>6</sub>                  | Cubic, $O_{h-Fm\bar{3}m}^5$                             | 352, 456        | 633           | weak        | -                    | 8     |
|                                | (NH <sub>4</sub> ) <sub>2</sub> SnF <sub>6</sub>  | Trigonal, $D_{3d-P\bar{3}m1}^3$                         | 365, 468        | 633           | weak        | -                    | 1     |
|                                | Na <sub>2</sub> SnF <sub>6</sub>                  | Tetragonal, $D_{4h-}^{14}$<br><i>P4<sub>2</sub>/mnm</i> | 360, 470        | 626           | weak        | -                    | 14    |
|                                | K <sub>2</sub> SnF <sub>6</sub> ·H <sub>2</sub> O | Orthorhombic, $D_{2h-}^{24}$<br><i>Fddd</i>             | 365, 465        | 632           | Strong, 623 | -                    | 15    |
|                                | NaKSnF <sub>6</sub>                               | Orthorhombic,<br><i>Pna21(33)</i>                       | 378, 467        | 627           | Strong, 618 | 84*                  | 16    |
|                                | Rb <sub>2</sub> SnF <sub>6</sub>                  | Trigonal, $D_{3d-P\bar{3}m1}^3$                         | 360, 460        | 630           | weak        | 70.3*                | 17    |

|                                  |                                            |                                        |          |     |             |                     |        |
|----------------------------------|--------------------------------------------|----------------------------------------|----------|-----|-------------|---------------------|--------|
|                                  | $\text{Cs}_2\text{SnF}_6$                  | Trigonal, $D_{3d}^3\text{-}P\bar{3}m1$ | 370, 470 | 633 | weak        | -                   | 14     |
|                                  | $(\text{NH}_4)_2\text{TiF}_6$              | Trigonal, $D_{3d}^3\text{-}P\bar{3}m1$ | 380, 480 | 632 | weak        | 16.4*               | 1, 18  |
|                                  | $\text{Na}_2\text{TiF}_6$                  | Trigonal, $D_3^2\text{-}P321$          | 355, 460 | 627 | Strong, 617 | -                   | 10     |
|                                  | $\text{K}_2\text{TiF}_6$                   | Trigonal, $D_{3d}^3\text{-}P\bar{3}m1$ | 355, 456 | 631 | weak        | 98*                 | 19     |
|                                  | $\text{Rb}_2\text{TiF}_6$                  | Trigonal, $D_{3d}^3\text{-}P\bar{3}m1$ | 468      | 630 | weak        | 91*                 | 20-22  |
|                                  | $\text{Cs}_2\text{TiF}_6$                  | Trigonal, $D_{3d}^3\text{-}P\bar{3}m1$ | 360, 471 | 632 | weak        | -                   | 23     |
|                                  | $\text{Li}_2\text{ZrF}_6$                  | Trigonal, $D_{3d}^3\text{-}P\bar{3}m1$ | 376, 463 | 631 | weak        | -                   | 24     |
|                                  | $\text{Rb}_2\text{ZrF}_6$                  | Trigonal, $D_{3d}^3\text{-}P\bar{3}m1$ | 360, 474 | 629 | weak        | 75*                 | 25     |
|                                  | $\text{Cs}_2\text{ZrF}_6$                  | Trigonal, $D_{3d}^3\text{-}P\bar{3}m1$ | 364, 475 | 631 | weak        | 56.9*               | 26     |
|                                  | $\text{Rb}_2\text{HfF}_6$                  | Trigonal, $D_{3d}^3\text{-}P\bar{3}m1$ | 360, 465 | 630 | weak        | 55.6*               | 27     |
|                                  | $\text{Cs}_2\text{HfF}_6$                  | Trigonal, $D_{3d}^3\text{-}P\bar{3}m1$ | 379, 477 | 632 | weak        | 90*                 | 27, 28 |
|                                  | $\text{BaSiF}_6$                           | Trigonal, $D_{3d}^5\text{-}R\bar{3}m$  | 365, 466 | 632 | weak        | -                   | 29-32  |
|                                  | $\text{ZnSiF}_6 \cdot 6\text{H}_2\text{O}$ | Trigonal, $C_{3i}^2\text{-}R\bar{3}$   | 360, 460 | 630 | weak        | -                   | 33-35  |
|                                  | $\text{BaGeF}_6$                           | Trigonal, $D_{3d}^5\text{-}R\bar{3}m$  | 358, 460 | 634 | weak        | -                   | 36, 37 |
|                                  | $\text{ZnGeF}_6 \cdot 6\text{H}_2\text{O}$ | Trigonal, $C_{3i}^2\text{-}R\bar{3}$   | 370, 470 | 630 | weak        | -                   | 33, 38 |
| BXF <sub>6</sub>                 | $\text{BaSnF}_6$                           | Trigonal, $C_{3i}^2\text{-}R\bar{3}$   | 368, 467 | 631 | weak        | -                   | 39, 40 |
|                                  | $\text{ZnSnF}_6 \cdot 6\text{H}_2\text{O}$ | Trigonal, $C_{3i}^2\text{-}R\bar{3}$   | 370, 480 | 629 | weak        | -                   | 41     |
|                                  | $\text{BaTiF}_6$                           | Trigonal, $D_{3d}^5\text{-}R\bar{3}m$  | 356, 466 | 634 | weak        | 73.2*               | 42, 43 |
|                                  | $\text{ZnTiF}_6 \cdot 6\text{H}_2\text{O}$ | Trigonal, $C_{3i}^2\text{-}R\bar{3}$   | 360, 465 | 631 | weak        | 26*, 6 <sup>#</sup> | 44, 45 |
| $\text{A}_2\text{A}'\text{MF}_6$ | $\text{Na}_3\text{AlF}_6$                  | Monoclinic, $C_{2h}^5\text{-}P2_1/c$   | 356, 465 | 627 | Strong, 620 | -                   | 46     |
|                                  | $\text{K}_2\text{LiAlF}_6$                 | Cubic, $O_h^5\text{-}Fm\bar{3}m$       | 360, 468 | 635 | Strong, 625 | -                   | 47     |



|                                    |                              |                                                   |                 |            |                                       |                                |                  |
|------------------------------------|------------------------------|---------------------------------------------------|-----------------|------------|---------------------------------------|--------------------------------|------------------|
|                                    | $K_3AlF_6$                   | Tetragonal, $C_{4h}^6-I4_1/a$                     | 360, 460        | 626        | Strong, 618                           | 88*, 51 <sup>#</sup>           | 48               |
|                                    | $K_2NaAlF_6$                 | Cubic, $O_h^5-Fm\bar{3}m$                         | 464             | 630        | Strong, 624                           | 58.4*                          | 49, 50           |
|                                    | $Cs_2KAlF_6$                 | Cubic, $O_h^5-Fm\bar{3}m$                         | 469             | 632        | weak                                  | 50.6*                          | 51               |
|                                    | $Cs_3AlF_6$                  | Cubic, $O_h^5-Fm\bar{3}m$                         | 361, 467        | 634        | weak                                  | 48.2*                          | 52               |
|                                    | $Na_3GaF_6$                  | Monoclinic, $C_{2h}^5$<br>$P2_1/c$                | 360, 467        | 627        | Strong, 620                           | 69*                            | 53               |
|                                    | $K_2LiGaF_6$                 | Cubic, $O_h^5-Fm\bar{3}m$                         | 363, 467        | 635        | Strong, 626                           | 20*                            | 54               |
|                                    | $K_3GaF_6$                   | Tetragonal, $C_{4h}^6-I4_1/a$                     | 467             | 626        | Strong, 618                           | 46*                            | 55               |
|                                    | $K_2NaGaF_6$                 | Cubic, $O_h^5-Fm\bar{3}m$                         | 365, 467        | 629        | Strong, 621                           | 61*                            | 56               |
| $A_2NF_7$                          | $K_2TaF_7$                   | Monoclinic, $C_{2h}^5$<br>$P2_1/c$                | 362, 461        | 627        | Strong, 619                           | 99.6*                          | 57               |
|                                    | $K_2NbF_7$                   | Monoclinic, $C_{2h}^5$<br>$P2_1/c$                | 369, 467        | 628        | Strong, 620                           | 71.3*                          | 57, 58           |
| $A_2NO_xF_{6-x}$                   | $Cs_2NbOF_5$                 | Trigonal,<br>$P3(No.143)$                         | 371, 474        | 633        | weak                                  | 63.4*                          | 59, 60           |
|                                    | $Rb_2NbOF_5$                 | Trigonal, $D_{3d}^3-P\bar{3}m1$                   | 630, 465        | 631        | weak                                  | 68*, 19 <sup>#</sup>           | 61               |
|                                    | $Na_2WO_2F_4$                | Orthorhombic,<br>$Pbcn(60)$                       | 367, 469        | 619        | 超强, 619                               | 76.6*                          | 62-64            |
|                                    | $Cs_2WO_2F_4$                | Trigonal, $D_{3d}^3-P\bar{3}m1$                   | 374, 470        | 632        | weak                                  | -                              | 65               |
| $A_2A'XF_7$                        | $K_3SiF_7$                   | $P4/mbm$                                          | 360, 460        | 631        | weak                                  | -                              | 66               |
|                                    | $Rb_3SiF_7$                  | $P4/mbm$                                          | 360, 460        | 631        | weak                                  | -                              | 67               |
|                                    | $RbCs_2SiF_7$                | $P4/mbm$                                          | 360, 460        | 631        | weak                                  | -                              | 67               |
| Organic-<br>Inorganic<br>Compounds | $[C(NH_2)_3]AlF_6$           | $Pa\bar{3}$                                       | 358, 462        | 630        | Strong                                | 27.8*, 6.4 <sup>#</sup>        | 68               |
|                                    | $[N(CH_3)_4]_2GeF_6$         | $R\bar{3}$                                        | 367, 470        | 630        | weak                                  | 92.2*, 64.6 <sup>#</sup>       | 69               |
|                                    | $[N(CH_3)_4]_2TiF_6$         | $R\bar{3}$                                        | 367, 470        | 630        | weak                                  | 83.3*, 54.5 <sup>#</sup>       | 69               |
|                                    | $[N(CH_3)_4]_2ZrF_6$         | $R\bar{3}$                                        | 367, 470        | 630        | weak                                  | 79.2*, 50.7 <sup>#</sup>       | 69               |
|                                    | <b><math>KLiTiF_6</math></b> | <b>orthorhombic</b><br><b><math>Pca2_1</math></b> | <b>371, 469</b> | <b>632</b> | <b>Strong, 612.0,</b><br><b>613.7</b> | <b>48.2*, 16.1<sup>#</sup></b> | <b>This work</b> |

\* indicates internal quantum efficiency, # indicates external quantum efficiency, and blank indicates no reference data.



**Table. S3.** The formation energy of Mn<sup>4+</sup> doping in the KLiTiF<sub>6</sub> matrix under different charge compensation mechanisms.

| Models | Charge compensation for Mn <sup>4+</sup> doping       | Formation energy (eV) |
|--------|-------------------------------------------------------|-----------------------|
| M1     | $Mn_{Ti}^{\times} + V_{Ti}^{\times}$                  | 5.12                  |
| M2     | $Mn_{Li}^{\dots} + Li_{Ti}^{\cdot} + V_{Ti}^{\times}$ | 10.13                 |
| M3     | $Mn_{Li}^{\dots} + 2V_K^{\cdot} + F_i^{\cdot}$        | 12.68                 |
| M4     | $Mn_{Li}^{\dots} + 2V_{Li}^{\cdot} + F_i^{\cdot}$     | 14.46                 |
| M5     | $Mn_{Li}^{\dots} + 3V_{Li}^{\cdot}$                   | 16.58                 |
| M6     | $Mn_{Li}^{\dots} + 3V_K^{\cdot}$                      | 17.43                 |

**Table. S4.** The structure parameters of M1 and M2 charge compensation mechanisms.

| Structure parameters           | M1                       | M2                       |
|--------------------------------|--------------------------|--------------------------|
| F1-Mn-F2                       | 176.5767°                | /                        |
| F3-Mn-F6                       | 179.4912°                | /                        |
| F4-Mn-F5                       | 178.7213°                | /                        |
| F7-Mn-F8                       | /                        | 178.1263°                |
| F9-Mn-F12                      | /                        | 172.8671°                |
| F10-Mn-F11                     | /                        | 179.4115(0)              |
| Average bond length            | 1.8359 Å                 | 1.8312 Å                 |
| Polyhedral volume              | 8.2426 Å <sup>3</sup>    | 8.1632 Å <sup>3</sup>    |
| Distortion index (bond length) | 0.00457                  | 0.01271                  |
| Quadratic elongation           | 1.0007                   | 1.0022                   |
| Bond angle variance            | 2.2677 deg. <sup>2</sup> | 6.6138 deg. <sup>2</sup> |
| Effective coordination number  | 5.9947                   | 5.9492                   |

**Table. S5.** Color coordinate offset for KLTF:4%Mn<sup>4+</sup> under different temperatures

| Temperature (K) | CIE coordinates (x, y) | $\Delta E$ |
|-----------------|------------------------|------------|
| 300             | 0.695,0.305            | 0          |
| 320             | 0.694,0.306            | 0.00285    |
| 340             | 0.693,0.307            | 0.00568    |
| 360             | 0.692,0.308            | 0.00849    |
| 380             | 0.690,0.310            | 0.01408    |
| 400             | 0.687,0.313            | 0.02236    |
| 420             | 0.681,0.319            | 0.03852    |
| 440             | 0.673,0.327            | 0.05932    |

**Table. S6.**

| Phosphors                                                              | Chromaticity coordinate of phosphor | Chromaticity coordinate of white LED | CCT (K) | LE (lm/W) | color gamut of NTSC (%) | Refs.     |
|------------------------------------------------------------------------|-------------------------------------|--------------------------------------|---------|-----------|-------------------------|-----------|
| Cs <sub>2</sub> KInF <sub>6</sub> :Mn <sup>4+</sup>                    | (0.696, 0.304)                      | (0.3059, 0.3191)                     | 7001    | -         | 101.7                   | 70        |
| Cs <sub>2</sub> KScF <sub>6</sub> :Mn <sup>4+</sup>                    | (0.6933, 0.3064)                    | (0.3009, 0.3144)                     | 6088    | 68.21     | 107.9                   | 71        |
| Cs <sub>2</sub> KGaF <sub>6</sub> :Mn <sup>4+</sup>                    | -                                   | (0.2811, 0.3107)                     | 8951    | 106.3     | 114.8                   | 72        |
| Rb <sub>2</sub> MoO <sub>2</sub> F <sub>4</sub> :Mn <sup>4+</sup>      | -                                   | (0.2801, 0.2864)                     | 10172   | 82.75     | 101.6                   | 73        |
| Cs <sub>2</sub> NaAlF <sub>6</sub> :Mn <sup>4+</sup>                   | (0.7032, 0.2967)                    | (0.7032, 0.2967)                     | 7466    | 87.7      | 107.8                   | 74        |
| (Me <sub>4</sub> N) <sub>2</sub> BF <sub>6</sub> :Mn <sup>4+</sup>     | -                                   | (0.2886, 0.3140)                     | 8262    | 143.09    | 112.0                   | 69        |
| Cs <sub>2</sub> NaGaF <sub>6</sub> :Mn <sup>4+</sup>                   | (0.7027, 0.2968)                    | (0.2966, 0.2995)                     | 7274    | 97.29     | 110.64                  | 75        |
| Cs <sub>2</sub> NaGaF <sub>6</sub> :Mn <sup>4+</sup> , Li <sup>+</sup> | (0.7029, 0.2970)                    | (0.2742, 0.3460)                     | 7312    | 110.57    | 110.68                  | 75        |
| K <sub>2</sub> NaScF <sub>6</sub> : Mn <sup>4+</sup>                   | (0.6941, 0.3057)                    | (0.2883, 0.2996)                     | 8841    | 73.7      | 105.6                   | 76        |
| K <sub>2</sub> NaScF <sub>6</sub> : Mn <sup>4+</sup>                   | -                                   | (0.2883, 0.2996)                     | 8841    | 73.7      | 105.6                   | 77        |
| Rb <sub>2</sub> NaScF <sub>6</sub> : Mn <sup>4+</sup>                  | -                                   | (0.2891, 0.3056)                     | 8458    | 80.7      | 108.4                   | 77        |
| Cs <sub>2</sub> NaScF <sub>6</sub> : Mn <sup>4+</sup>                  | -                                   | (0.2852, 0.3159)                     | 8470    | 77.0      | 105.6                   | 77        |
| Cs <sub>2</sub> MoO <sub>2</sub> F <sub>4</sub> :Mn <sup>4+</sup>      | (0.6958, 0.3041)                    | (0.2948, 0.3104)                     | 7896    | 114.7     | 109.1                   | 78        |
| BaTaF <sub>7</sub> :Mn <sup>4+</sup>                                   | -                                   | (0.31, 0.33)                         | 6693    | 22.06     | 113.4                   | 79        |
| [C(NH <sub>2</sub> ) <sub>3</sub> ]AlF <sub>6</sub> :Mn <sup>4+</sup>  | -                                   | (0.2929, 0.3050)                     | 8172    | 45.96     | 108.3                   | 68        |
| (Me <sub>4</sub> N) <sub>2</sub> SnF <sub>6</sub> :Mn <sup>4+</sup>    | -                                   | (0.3015, 0.3063)                     | 7489    | 122.42    | 124                     | 80        |
| Rb <sub>2</sub> NaGaF <sub>6</sub> :Mn <sup>4+</sup>                   | -                                   | (0.2928, 0.3264)                     | 7703    | 59.43     | 108.6                   | 81        |
| KLiTiF <sub>6</sub> :Mn <sup>4+</sup>                                  | -                                   | (0.272, 0.311)                       | 9961    | 91.6      | 116.1                   | This Work |

## References

1. Y. K. Xu and S. Adachi, *J. Electrochem. Soc.* **2011**, *159*, E11.
2. Y. K. Xu and S. Adachi, *J. Appl. Phys.* **2009**, *105*, 013525.
3. S. Adachi and T. Takahashi, *J. Appl. Phys.* **2008**, *104*, 023512.
4. T. Nakamura, Z. Yuan and S. Adachi, *Appl. Surf. Sci.* **2014**, *320*, 514.
5. S. Adachi, H. Abe, R. Kasa and T. Arai, *J. Electrochem. Soc.* **2012**, *159*, J34.
6. Y. Jin, M. H. Fang, M. Grinberg, S. Mahlik, T. Lesniewski, M. G. Brik, G. Y. Luo, J. G. Lin and R. S. Liu, *ACS Appl. Mater. Inter.* **2016**, *8*, 11194.
7. M. H. Fang, N. Hoang-Duy, C. C. Lin and R. S. Liu, *J. Mater. Chem. C* **2015**, *3*, 7277.
8. Y. Arai and S. Adachi, *J. Electrochem. Soc.* **2011**, *158*, J179.
9. E. H. Song, Y. Y. Zhou, X. B. Yang, Z. F. Liao, W. R. Zhao, T. T. Deng, L. Y. Wang, Y. Y. Ma, S. Ye and Q. Y. Zhang, *Acs Photonics* **2017**, *4*, 2556.
10. Z. L. Wang, Y. Liu, Y. Y. Zhou, Q. Zhou, H. Y. Tan, Q. H. Zhang and J. H. Peng, *RSC Adv.* **2015**, *5*, 58136.
11. L. L. Wei, C. C. Lin, M. H. Fang, M. G. Brik, S. F. Hu, H. Jiao and R. S. Liu, *J. Mater. Chem. C* **2015**, *3*, 1655.
12. L. L. Wei, C. C. Lin, Y. Y. Wang, M. H. Fang, H. Jiao and R. S. Liu, *ACS Appl. Mater. Inter.* **2015**, *7*, 10656.
13. W. L. Wu, M. H. Fang, W. L. Zhou, T. Lesniewski, S. Mahlik, M. Grinberg, M. G. Brik, H. S. Sheu, B. M. Cheng, J. Wang and R. S. Liu, *Chem. Mater.* **2017**, *29*, 935.
14. Y. Arai and S. Adachi, *J. Lumin.* **2011**, *131*, 2652.
15. Y. Arai, T. Takahashi and S. Adachi, *Opt. Mater.* **2010**, *32*, 1095.
16. L. Q. Xi, Y. X. Pan, M. M. Zhu, H. Z. Lian and J. Lin, *J. Mater. Chem. C* **2017**, *5*, 9255.
17. C. Y. Jiang, M. G. Brik, A. M. Srivastava, L. H. Li and M. Y. Peng, *J. Mater. Chem. C* **2019**, *7*, 247.
18. L. Q. Xi, Y. X. Pan, S. M. Huang and G. K. Liu, *RSC Adv.* **2016**, *6*, 76251.
19. H. Guo, J. Zhang, L. Ma, J. L. Chavez, L. Yin, H. Gao, Z. Tang and W. Chen, *Adv. Funct. Mater.* **2015**, *25*, 6833.
20. S. Sakurai, T. Nakamura and S. Adachi, *ECS J. Solid State Sci. Technol.* **2016**, *5*, R206.
21. Z. L. Wang, Z. Y. Yang, H. Y. Tan, M. G. Brik, Q. Zhou, G. Chen and H. B. Liang, *Opt. Mater.* **2017**, *72*, 78.
22. L. Y. Wang, E. H. Song, Y. Y. Zhou, T. T. Deng, S. Ye and Q. Y. Zhang, *J. Mater. Chem. C* **2018**, *6*, 8670.
23. Q. Zhou, Y. Y. Zhou, Y. Liu, Z. L. Wang, G. Chen, J. H. Peng, J. Yan and M. M. Wu, *J. Mater. Chem. C* **2015**, *3*, 9615.
24. L. Zhang, L. Q. Xi, Y. X. Pan, Y. J. Jia, M. M. Wu, H. Z. Lian and J. Lin, *Dalton Trans.* **2018**, *47*, 16516.
25. L. Y. Wang, E. H. Song, Y. Y. Zhou, T. T. Deng, S. Ye and Q. Y. Zhang, *J. Mater. Chem. C* **2017**, *5*, 7253.
26. Q. Zhou, H. Y. Tan, Y. Y. Zhou, Q. H. Zhang, Z. L. Wang, J. Yan and M. M. Wu, *J. Mater. Chem. C* **2016**, *4*, 7443.
27. Z. F. Yang, Q. W. Wei, M. Z. Rong, Z. Y. Yang, Z. L. Wang, Q. Zhou and Q. Wang, *Dalton Trans.* **2017**, *46*, 9451.
28. T. Senden, E. J. van Harten and A. Meijerink, *J. Lumin.* **2018**, *194*, 131.

29. D. Sekiguchi, J.-i. Nara and S. Adachi, *J. Appl. Phys.* **2013**, *113*, 183516.
30. X. Y. Jiang, Y. X. Pan, S. M. Huang, X. A. Chen, J. G. Wang and G. K. Liu, *J. Mater. Chem. C* **2014**, *2*, 2301.
31. Y. X. Pan, Z. Chen, X. Y. Jiang, S. M. Huang and M. M. Wu, *J. Am. Ceram. Soc.* **2016**, *99*, 3008.
32. Q. Zhou, Y. Y. Zhou, F. Q. Lu, Y. Liu, Q. Wang, L. J. Luo and Z. L. Wang, *Mater. Chem. Phys.* **2016**, *170*, 32.
33. M. Kubus, D. Enseling, T. Juestel and H. J. Meyer, *J. Lumin.* **2013**, *137*, 88.
34. L. F. Lv, X. Y. Jiang, Y. X. Pan, G. K. Liu and S. M. Huang, *J. Lumin.* **2014**, *152*, 214.
35. R. Hoshino and S. Adachi, *J. Appl. Phys.* **2013**, *114*, 213502.
36. D. Sekiguchi and S. Adachi, *Opt. Mater.* **2015**, *42*, 417.
37. Q. Zhou, Y. Y. Zhou, Y. Liu, L. J. Luo, Z. L. Wang, J. H. Peng, J. Yan and M. M. Wu, *J. Mater. Chem. C* **2015**, *3*, 3055.
38. R. Hoshino and S. Adachi, *J. Lumin.* **2015**, *162*, 63.
39. R. Hoshino, T. Nakamura and S. Adachi, *ECS J. Solid State Sci. Technol.* **2016**, *5*, R37.
40. L. Q. Xi and Y. X. Pan, *Mater. Res. Bull.* **2017**, *86*, 57.
41. R. Hoshino and S. Adachi, *Opt. Mater.* **2015**, *48*, 36.
42. X. Y. Jiang, Z. Chen, S. M. Huang, J. G. Wang and Y. X. Pan, *Dalton Trans.* **2014**, *43*, 9414.
43. Y. G. Wang, T. Wen, L. Y. Tang, L. X. Yang, W. G. Yang and Y. S. Zhao, *Dalton Trans.* **2015**, *44*, 7578.
44. J. S. Zhong, D. Q. Chen, X. Wang, L. F. Chen, H. Yu, Z. G. Ji and W. D. Xiang, *J. Alloys Compd.* **2016**, *662*, 232.
45. R. Hoshino, S. Sakurai, T. Nakamura and S. Adachi, *J. Lumin.* **2017**, *184*, 160.
46. E. H. Song, J. Q. Wang, S. Ye, X. F. Jiang, M. Y. Peng and Q. Y. Zhang, *J. Mater. Chem. C* **2016**, *4*, 2480.
47. Y. W. Zhu, L. Huang, R. Zou, J. H. Zhang, J. B. Yu, M. M. Wu, J. Wang and Q. Su, *J. Mater. Chem. C* **2016**, *4*, 5690.
48. E. H. Song, J. Q. Wang, J. H. Shi, T. T. Deng, S. Ye, M. Y. Peng, J. Wang, L. Wondraczek and Q. Y. Zhang, *ACS Appl. Mater. Inter.* **2017**, *9*, 8805.
49. L. Y. Wang, E. H. Song, T. T. Deng, Y. Y. Zhou, Z. F. Liao, W. R. Zhao, B. Zhou and Q. Y. Zhang, *Dalton Trans.* **2017**, *46*, 9925.
50. Y. W. Zhu, L. Y. Cao, M. G. Brik, X. J. Zhang, L. Huang, T. T. Xuan and J. Wang, *J. Mater. Chem. C* **2017**, *5*, 6420.
51. T. T. Deng, E. H. Song, Y. Y. Zhou, L. Y. Wang and Q. Y. Zhang, *J. Mater. Chem. C* **2017**, *5*, 12422.
52. H. Ming, J. F. Zhang, L. L. Liu, J. Q. Peng, F. Du and X. Y. Ye, *ECS J. Solid State Sci. Technol.* **2018**, *7*, R149.
53. T. T. Deng, E. H. Song, J. Sun, L. Y. Wang, Y. Deng, S. Ye, J. Wang and Q. Y. Zhang, *J. Mater. Chem. C* **2017**, *5*, 2910.
54. Y. W. Zhu, J. B. Yu, Y. Liu, M. G. Brik, L. Huang, T. T. Xuan and J. Wang, *RSC Adv.* **2017**, *7*, 30588.
55. T. T. Deng, E. H. Song, Y. Y. Zhou, L. Y. Wang, S. Ye and Q. Y. Zhang, *J. Mater. Chem. C* **2017**, *5*, 9588.

56. C. Y. Jiang, M. G. Brik, L. H. Li, L. Y. Li, J. Peng, J. N. Wu, M. S. Molokeev, K. L. Wong and M. Y. Peng, *J. Mater. Chem. C* **2018**, *6*, 3016.
57. H. Lin, T. Hu, Q. M. Huang, Y. Cheng, B. Wang, J. Xu, J. M. Wang and Y. S. Wang, *Laser Photonics Rev.* **2017**, *11*, 1700148.
58. H. Ming, J. F. Zhang, S. F. Liu, J. Q. Peng, F. Du, J. H. Huang, L. B. Xia and X. Y. Ye, *Opt. Mater.* **2018**, *86*, 352.
59. H. Ming, J. F. Zhang, L. L. Liu, J. Q. Peng, F. Du, X. Y. Ye, Y. M. Yang and H. P. Nie, *Dalton Trans.* **2018**, *47*, 16048.
60. Q. Wang, Z. Y. Yang, H. Y. Wang, Z. K. Chen, H. L. Yang, J. Yang and Z. L. Wang, *Opt. Mater.* **2018**, *85*, 96.
61. Z. L. Wang, Z. Y. Yang, Z. F. Yang, Q. W. Wei, Q. Zhou, L. Ma and X. J. Wang, *Inorg. Chem.* **2019**, *58*, 456.
62. T. Hu, H. Lin, Y. Cheng, Q. M. Huang, J. Xu, Y. Gao, J. M. Wang and Y. S. Wang, *J. Mater. Chem. C* **2017**, *5*, 10524.
63. P. Q. Cai, X. F. Wang and H. J. Seo, *Phys. Chem. Chem. Phys.* **2018**, *20*, 2028.
64. T. Hu, H. Lin, Y. Gao, J. Xu, J. M. Wang, X. Q. Xiang and Y. S. Wang, *J. Am. Ceram. Soc.* **2018**, *101*, 3437.
65. P. Q. Cai, L. Qin, C. L. Chen, J. Wang and H. J. Seo, *Dalton Trans.* **2017**, *46*, 14331.
66. M. Kim, W. B. Park, B. Bang, C. H. Kim and K.-S. Sohn, *J. Am. Ceram. Soc.* **2017**, *100*, 1044.
67. M. Kim, W. B. Park, J. W. Lee, J. Lee, C. H. Kim, S. P. Singh and K. S. Sohn, *Chem. Mater.* **2018**, *30*, 6936.
68. H. Ming, Y. F. Zhao, Y. Y. Zhou, S. Zhang, Y. J. Wang, E. H. Song, Z. G. Xia and Q. Y. Zhang, *ACS Appl. El. Mater.* **2020**, *2*, 4134.
69. H. Ming, Y. F. Zhao, Y. Y. Zhou, M. S. Molokeev, Y. J. Wang, S. Zhang, E. H. Song, S. Ye, Z. G. Xia and Q. Y. Zhang, *Adv. Opt. Mater.* **2022**, *10*, 2102141.
70. Y. Liu, S. Cheng, S. C. Yang, Z. T. Li, Z. J. Duan, Z. J. Hu, Z. G. Li, Y. H. Li, L. L. Yu, A. Z. Peng and X. D. Wen, *Ceram. Int.* **2022**, *48*, 37095.
71. Y. J. Wang, C. K. Yu, Y. Y. Zhou, E. H. Song, H. Ming and Q. Y. Zhang, *J. Alloy Compd.* **2021**, *855*, 157347.
72. J. Li, Y. J. Wang, H. F. Zhe, Y. Y. Zhou, Q. Zhou and Z. L. Wang, *J. Alloys Compd.* **2021**, *881*, 160624.
73. Y. Y. Zhou, H. Ming, S. Zhang, T. T. Deng, E. H. Song and Q. Y. Zhang, *Chem. Eng. J.* **2021**, *415*, 128794.
74. Y. J. Wang, W. Y. Tang, C. Zhang, M. S. Molokeev, H. Ming, Y. Y. Zhou, S. Peng, E. H. Song and Q. Y. Zhang, *Adv. Funct. Mater.* **2023**, *34*, 2313490.
75. W. Y. Tang, Y. J. Wang, Y. Y. Zhou, C. Zhang, Z. Chen, F. Q. He, E. H. Song and Q. Y. Zhang, *Adv. Opt. Mater.* **2024**, *12*, 2400250.
76. H. Ming, L. L. Liu, S. A. He, J. Q. Peng, F. Du, J. X. Fu, F. L. Yang and X. Y. Ye, *J. Mater. Chem. C* **2019**, *7*, 7237.
77. Y. Y. Zhou, E. H. Song, M. G. Brik, Y. J. Wang, T. Hu, Z. G. Xia and Q. Y. Zhang, *J. Mater. Chem. C* **2019**, *7*, 9203.
78. H. S. An, Y. L. Qin, C. W. Ting, W. Di, P. J. Qing and Y. X. Yu, *Dalton Trans.* **2020**, *49*, 11290.

79. K. L. Chen, S. Y. Jia, Z. F. Shao, X. X. Han, J. Yuan, Y. Y. Zhou and T. T. Deng, *J. Mater. Chem. C* **2023**, *11*, 7603.
80. H. Ming, Y. Y. Zhou\*, M. S. Molokeev, C. Zhang, L. Huang, Y. J. Wang, H. T. Sun, E. H. Song\* and Q. Y. Zhang\*, *ACS Mater. Lett.* **2024**, DOI: 10.1021/acsmaterialslett.4c00263, 1790.
81. H. F. Zhe, Y. J. Wang, J. Li, Y. Y. Zhou, Q. Zhou and Z. L. Wang, *ECS J. Solid State Sci. Technol.* **2021**, *10*, 096011.
